# Supplementary material for: Transcriptomics reveal different metabolic strategies for acid resistance and gamma-aminobutyric acid (GABA) production in select Levilactobacillus brevis strains
Source: PubMed Central journal article supplement (PMC8419935; doi:10.1186/s12934-021-01658-4), 2021-09-06

**Table S1. Measurement of glutamate and GABA in *Levilactobacillus brevis* Lbr-6108, Lbr-35, and ATCC 14869. The p-value is the result of an ANOVA with Tukey's multiple comparison test comparing the ODs of each strain to at T48 to Lbr-6108 in the respective media.**

| Strain   | Timepoint (hr) | Glutamate, MRS (µg/ml) |       | GABA, MRS (µg/ml) |       | OD, MRS (µg/ml) |       | p-value | Glutamate, MRS+MSG (µg/ml) |       | GABA, MRS+MSG (µg/ml) |       | OD, MRS+MSG (600nm) |         | p-value |
|----------|----------------|------------------------|-------|-------------------|-------|-----------------|-------|---------|----------------------------|-------|-----------------------|-------|---------------------|---------|---------|
|          |                | rep 1                  | rep 2 | rep 1             | rep 2 | rep 1           | rep 2 |         | rep 1                      | rep 2 | rep 1                 | rep 2 | rep 1               | rep 2   |         |
| Lbr-6108 | 0              | 660                    | 670   | 50                | 50    | 0.139           | 0.434 | 89000   | 88000                      | 50    | 50                    | 0.137 | 0.133               | >0.9999 |         |
| Lbr-6108 | 3              | 650                    | 640   | 50                | 50    | 0.434           | 0.432 | 90000   | 86000                      | 60    | 58                    | 0.412 | 0.397               |         |         |
| Lbr-6108 | 6              | 620                    | 590   | 66                | 70    | 0.667           | 0.671 | 86000   | 86000                      | 100   | 100                   | 0.615 | 0.602               |         |         |
| Lbr-6108 | 9              | 570                    | 510   | 210               | 190   | 1.056           | 1.069 | 87000   | 83000                      | 310   | 320                   | 0.959 | 0.968               |         |         |
| Lbr-6108 | 12             | 360                    | 350   | 340               | 350   | 1.291           | 1.320 | 81000   | 81000                      | 620   | 630                   | 1.217 | 1.226               |         |         |
| Lbr-6108 | 15             | 130                    | 120   | 500               | 520   | 1.478           | 1.448 | 72000   | 76000                      | 1200  | 1200                  | 1.406 | 1.386               |         |         |
| Lbr-6108 | 18             | 100                    | 100   | 500               | 500   | 1.638           | 1.611 | 63000   | 63000                      | 1900  | 2000                  | 1.542 | 1.540               |         |         |
| Lbr-6108 | 21             | 100                    | 100   | 500               | 500   | 1.767           | 1.763 | 50000   | 51000                      | 2800  | 2800                  | 1.689 | 1.722               |         |         |
| Lbr-6108 | 24             | 100                    | 100   | 500               | 500   | 1.816           | 1.833 | 37000   | 37000                      | 4000  | 3800                  | 1.789 | 1.774               |         |         |
| Lbr-6108 | 48             | 100                    | 100   | 500               | 510   | 1.733           | 1.753 | 250     | 300                        | 60000 | 60000                 | 1.724 | 1.733               |         |         |
| Lbr-35   | 0              | 690                    | 670   | 50                | 50    | 0.142           | 0.136 | 89000   | 88000                      | 53    | 50                    | 0.145 | 0.139               |         |         |
| Lbr-35   | 3              | 680                    | 660   | 50                | 50    | 0.519           | 0.500 | 89000   | 90000                      | 50    | 50                    | 0.476 | 0.491               |         |         |
| Lbr-35   | 6              | 670                    | 640   | 50                | 50    | 0.855           | 0.849 | 88000   | 86000                      | 50    | 50                    | 0.780 | 0.753               |         |         |
| Lbr-35   | 9              | 670                    | 700   | 54                | 59    | 1.086           | 1.110 | 86000   | 89000                      | 76    | 70                    | 1.029 | 1.021               |         |         |
| Lbr-35   | 12             | 710                    | 680   | 58                | 50    | 1.278           | 1.271 | 86000   | 90000                      | 61    | 56                    | 1.159 | 1.144               |         |         |
| Lbr-35   | 15             | 690                    | 680   | 50                | 51    | 1.446           | 1.397 | 88000   | 89000                      | 75    | 60                    | 1.266 | 1.278               |         |         |
| Lbr-35   | 18             | 680                    | 690   | 51                | 52    | 1.556           | 1.544 | 87000   | 89000                      | 63    | 63                    | 1.397 | 1.401               |         |         |
| Lbr-35   | 21             | 670                    | 680   | 54                | 58    | 1.650           | 1.687 | 89000   | 95000                      | 71    | 72                    | 1.502 | 1.564               |         |         |
| Lbr-35   | 24             | 630                    | 600   | 82                | 80    | 1.741           | 1.738 | 87000   | 88000                      | 120   | 110                   | 1.566 | 1.579               |         |         |
| Lbr-35   | 48             | 560                    | 540   | 170               | 160   | 1.690           | 1.690 | 90000   | 89000                      | 270   | 230                   | 1.655 | 1.621               |         |         |

**Table S2. Glutamate utilization and GABA production by *Levilactobacillus brevis* Lbr-6108 in MRS with different concentrations of MSG.**

| Timepoint (hr) | MRS with 10,000 µg/mL MSG |        |              |        |         |       | MRS with 30,000 µg/mL MSG |         |              |         |         |       | MRS with 90,000 µg/mL MSG |         |              |         |         |       |
|----------------|---------------------------|--------|--------------|--------|---------|-------|---------------------------|---------|--------------|---------|---------|-------|---------------------------|---------|--------------|---------|---------|-------|
|                | Glu Drake (µg/mL)         |        | GABA (µg/mL) |        | % Yield |       | Glu Drake (µg/mL)         |         | GABA (µg/mL) |         | % Yield |       | Glu Drake (µg/mL)         |         | GABA (µg/mL) |         | % Yield |       |
|                | rep 1                     | rep 2  | rep 1        | rep 2  | rep 1   | rep 2 | rep 1                     | rep 2   | rep 1        | rep 2   | rep 1   | rep 2 | rep 1                     | rep 2   | rep 1        | rep 2   | rep 1   | rep 2 |
| 5              | 5000.0                    | 4500.0 | 50.0         | 50.0   | 10.0%   | 11.1% | 10000.0                   | 3400.0  | 50.0         | 50.0    | 5.0%    | 14.7% | 5000.0                    | 4740.0  | 50.0         | 50.0    | 1.0%    | 1.1%  |
| 24             | 4200.0                    | 4290.0 | 2600.0       | 2620.0 | 61.9%   | 61.1% | 6000.0                    | 5920.0  | 2900.0       | 2930.0  | 48.3%   | 49.5% | 4000.0                    | 3790.0  | 1800.0       | 1830.0  | 45.0%   | 48.3% |
| 48             | 8200.0                    | 8160.0 | 5300.0       | 5310.0 | 64.6%   | 65.1% | 16300.0                   | 16270.0 | 10000.0      | 9970.0  | 61.3%   | 61.3% | 24000.0                   | 23530.0 | 13000.0      | 12680.0 | 54.2%   | 53.9% |
| 72             | 8000.0                    | 7980.0 | 6100.0       | 6075.0 | 76.3%   | 76.1% | 18200.0                   | 18405.0 | 12000.0      | 12140.0 | 65.9%   | 66.0% | 28000.0                   | 23530.0 | 16000.0      | 16450.0 | 57.1%   | 69.9% |

**Table S3. Gene List from Figure 4. Locus IDs are for *Levilactobacillus brevis* Lbr-6108 genome. Encoded protein functions are given for genes shown in Figure 4.**

| <b>Locus ID</b> | <b>Gene name</b> | <b>Protein function</b>                                                                                    | <b>Operon / pathway</b>          | <b>Panel in Figure 4</b> |
|-----------------|------------------|------------------------------------------------------------------------------------------------------------|----------------------------------|--------------------------|
| BGC39_04180     | <i>gadA</i>      | Glutamate decarboxylase (EC 4.1.1.15) GadA                                                                 | L-Glutamate decarboxylase operon | A                        |
| BGC39_07245     | <i>gadR</i>      | Transcriptional regulator GadR                                                                             | L-Glutamate decarboxylase operon | A                        |
| BGC39_07250     | <i>gadC</i>      | Glutamate/gamma-aminobutyrate antiporter                                                                   | L-Glutamate decarboxylase operon | A                        |
| BGC39_07255     | <i>gadB</i>      | Glutamate decarboxylase (EC 4.1.1.15) GadB                                                                 | L-Glutamate decarboxylase operon | A                        |
| BGC39_07260     | <i>gltX</i>      | Glutamyl-tRNA synthetase (EC 6.1.1.17; EC 6.1.1.24)                                                        | L-Glutamate decarboxylase operon | A                        |
| BGC39_05810     | <i>hmpT</i>      | Substrate-specific component HmpT of predicted hydroxymethylpyrimidine ECF transporter                     | Pyridoxal 5'-phosphate (PLP)     | B                        |
| BGC39_05815     | <i>thiD2</i>     | Novel pyridoxal kinase, thiD family (EC 2.7.1.35)                                                          | Pyridoxal 5'-phosphate (PLP)     | B                        |
| BGC39_05820     | <i>norD</i>      | Transcriptional regulator of pyridoxine metabolism / Pyridoxamine phosphate aminotransferase (EC 2.6.1.54) | Pyridoxal 5'-phosphate (PLP)     | B                        |
| BGC39_05050     | <i>argF</i>      | Ornithine carbamoyltransferase (EC 2.1.3.3)                                                                | Arginine deiminase operon        | C                        |
| BGC39_05055     | <i>arcA</i>      | Arginine deiminase (EC 3.5.3.6)                                                                            | Arginine deiminase operon        | C                        |
| BGC39_05060     | <i>arcD</i>      | Arginine/ornithine antiporter ArcD                                                                         | Arginine deiminase operon        | C                        |
| BGC39_06170     | <i>aguA</i>      | Agmatine deiminase (EC 3.5.3.12)                                                                           | Agmatine deiminase operon        | D                        |
| BGC39_06175     | <i>aguD</i>      | Agmatine/putrescine antiporter, associated with agmatine catabolism                                        | Agmatine deiminase operon        | D                        |
| BGC39_06180     | <i>aguB</i>      | Putrescine carbamoyltransferase (EC 2.1.3.6)                                                               | Agmatine deiminase operon        | D                        |
| BGC39_06130     | <i>mleP</i>      | Malate permease                                                                                            | Malolactic fermentation operon   | E                        |

|             |              |                                             |                                |   |
|-------------|--------------|---------------------------------------------|--------------------------------|---|
| BGC39_06135 | <i>mleS</i>  | Malolactic enzyme (EC 4.1.1.101)            | Malolactic fermentation operon | E |
| BGC39_06140 | <i>mleR</i>  | Malolactic regulator MleR                   | Malolactic fermentation operon | E |
| BGC39_06185 | <i>nhaC2</i> | Predicted tyrosine transporter, NhaC family | Tyrosine decarboxylase operon  | F |
| BGC39_06190 | <i>tdcP</i>  | Predicted tyrosine transporter, GadC family | Tyrosine decarboxylase operon  | F |
| BGC39_06195 | <i>tdcA</i>  | L-tyrosine decarboxylase (EC 4.1.1.25) TDC  | Tyrosine decarboxylase operon  | F |
| BGC39_06200 | <i>tyrS</i>  | Tyrosyl-tRNA synthetase (EC 6.1.1.1)        | Tyrosine decarboxylase operon  | F |

**Figure S1. Culture purity testing by species- and strain-specific PCR for *Levilactobacillus brevis* Lbr-6108 and Lbr-35.**

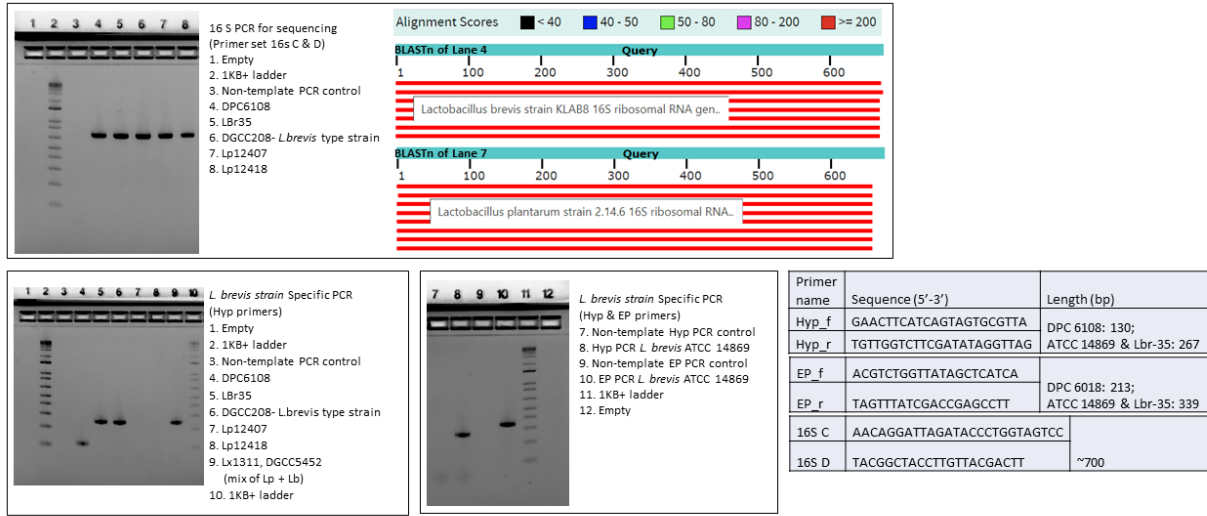

**Figure S2. PCA plot of RNA-sequencing for *Levilactobacillus brevis* Lbr-6108 and Lbr-35.**

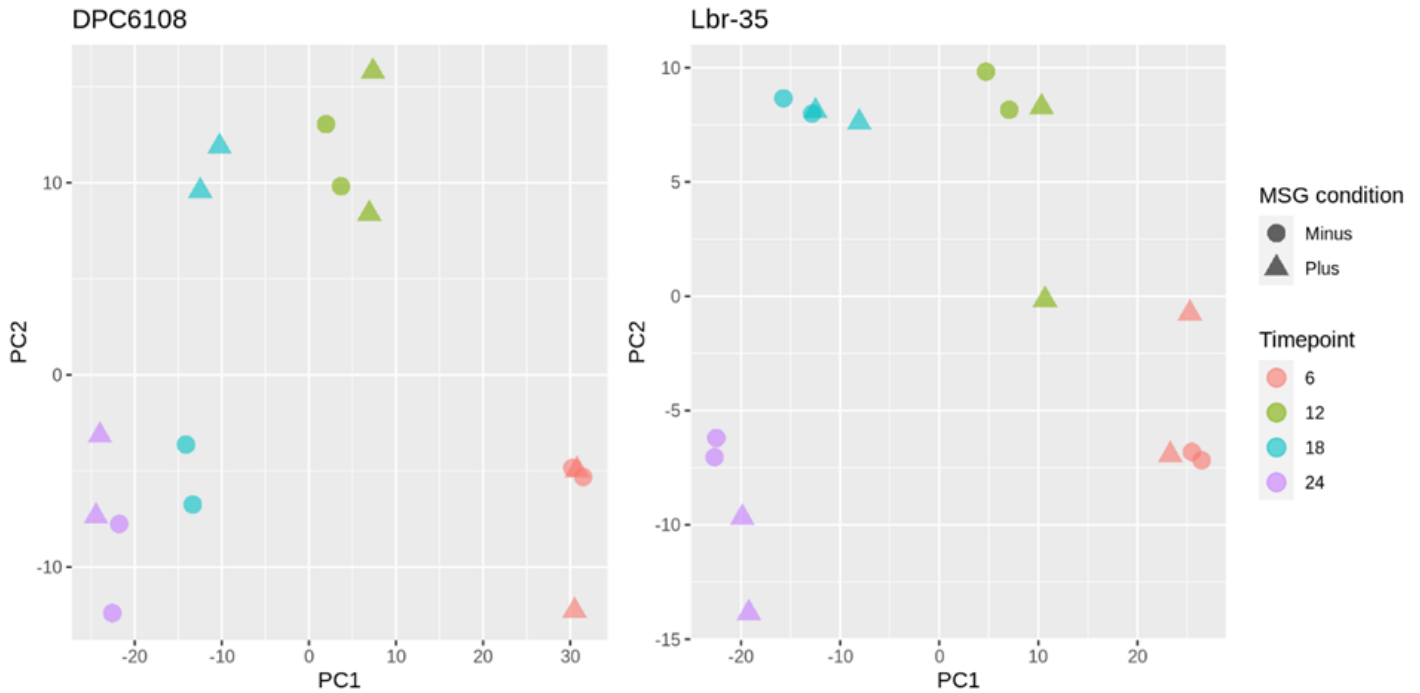

Supplement: 12934_2021_1658_MOESM1_ESM.pdf [file 12934_2021_1658_MOESM1_ESM.pdf]
